# Supplementary material for: A Poorly Known Catfish Clade in an Endangered Neotropical Biodiversity Hotspot: Relationships and Distribution Patterns of the Cambeva variegata Group (Siluriformes: Trichomycteridae)
Source: MDPI journal article supplement (doi:10.3390/fishes9040116), 2024-03-24

ML IQTREE  
RAG2  
Above branches:  
UltraFastBootstrap/aLRT

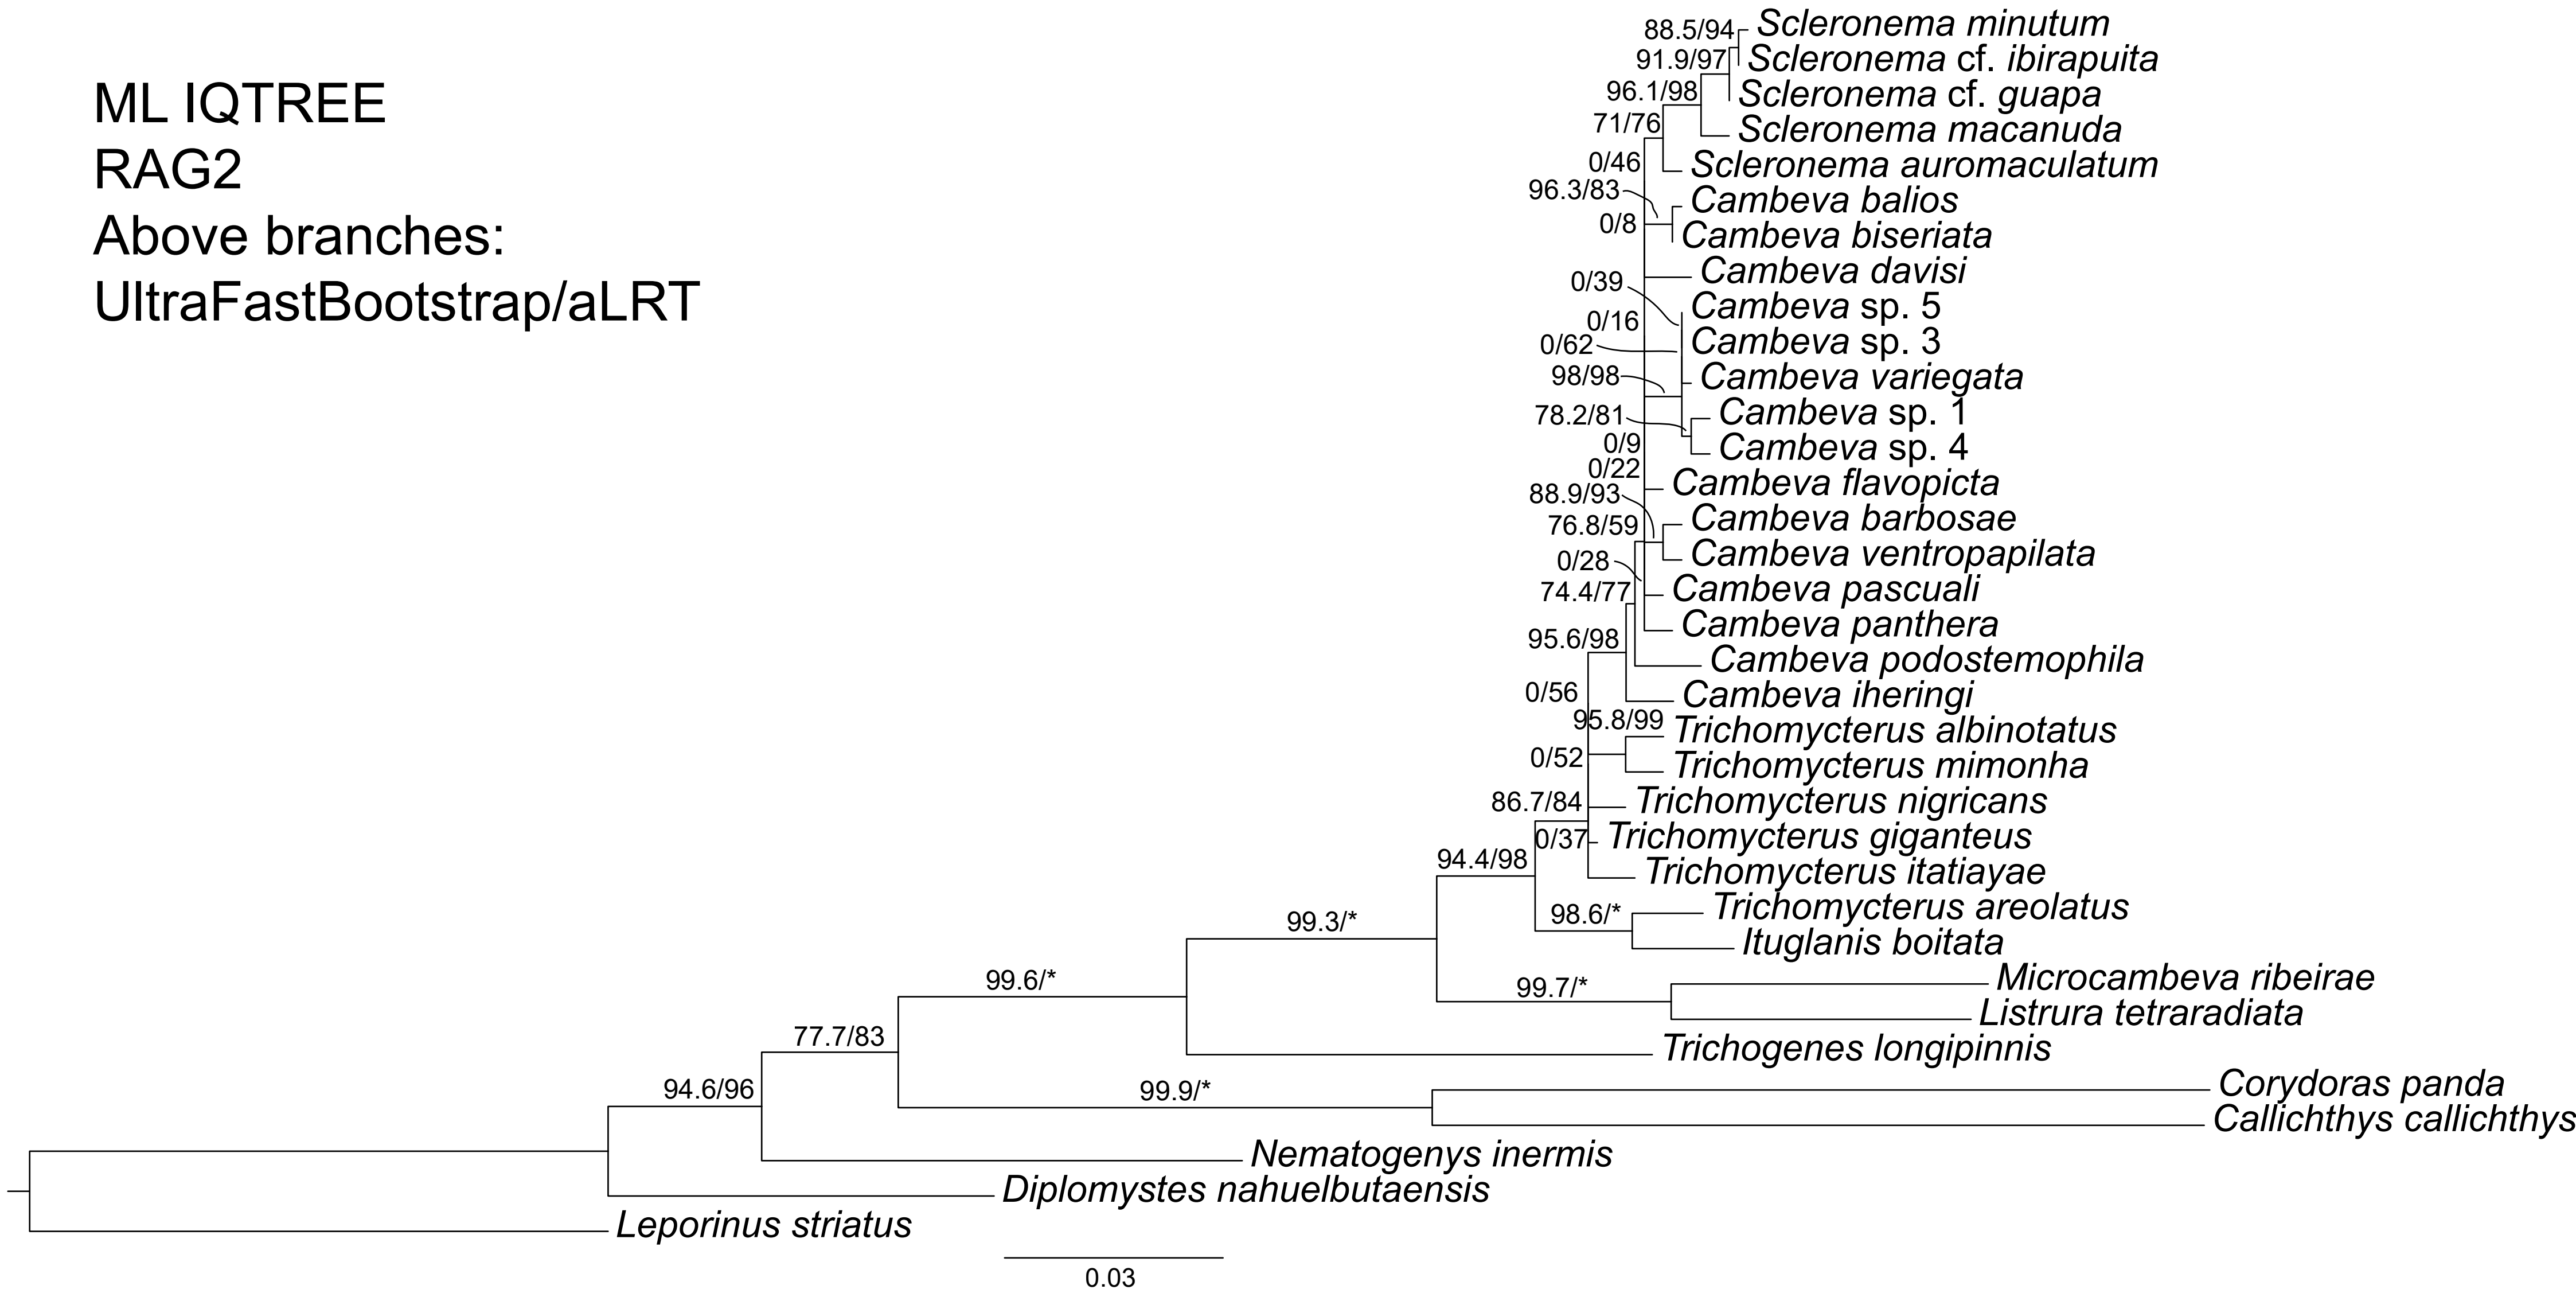

ML IQTREE  
COI+CYT+ND4+tRNAHisSerLeu  
Above branches:  
UltraFastBootstrap/aLRT

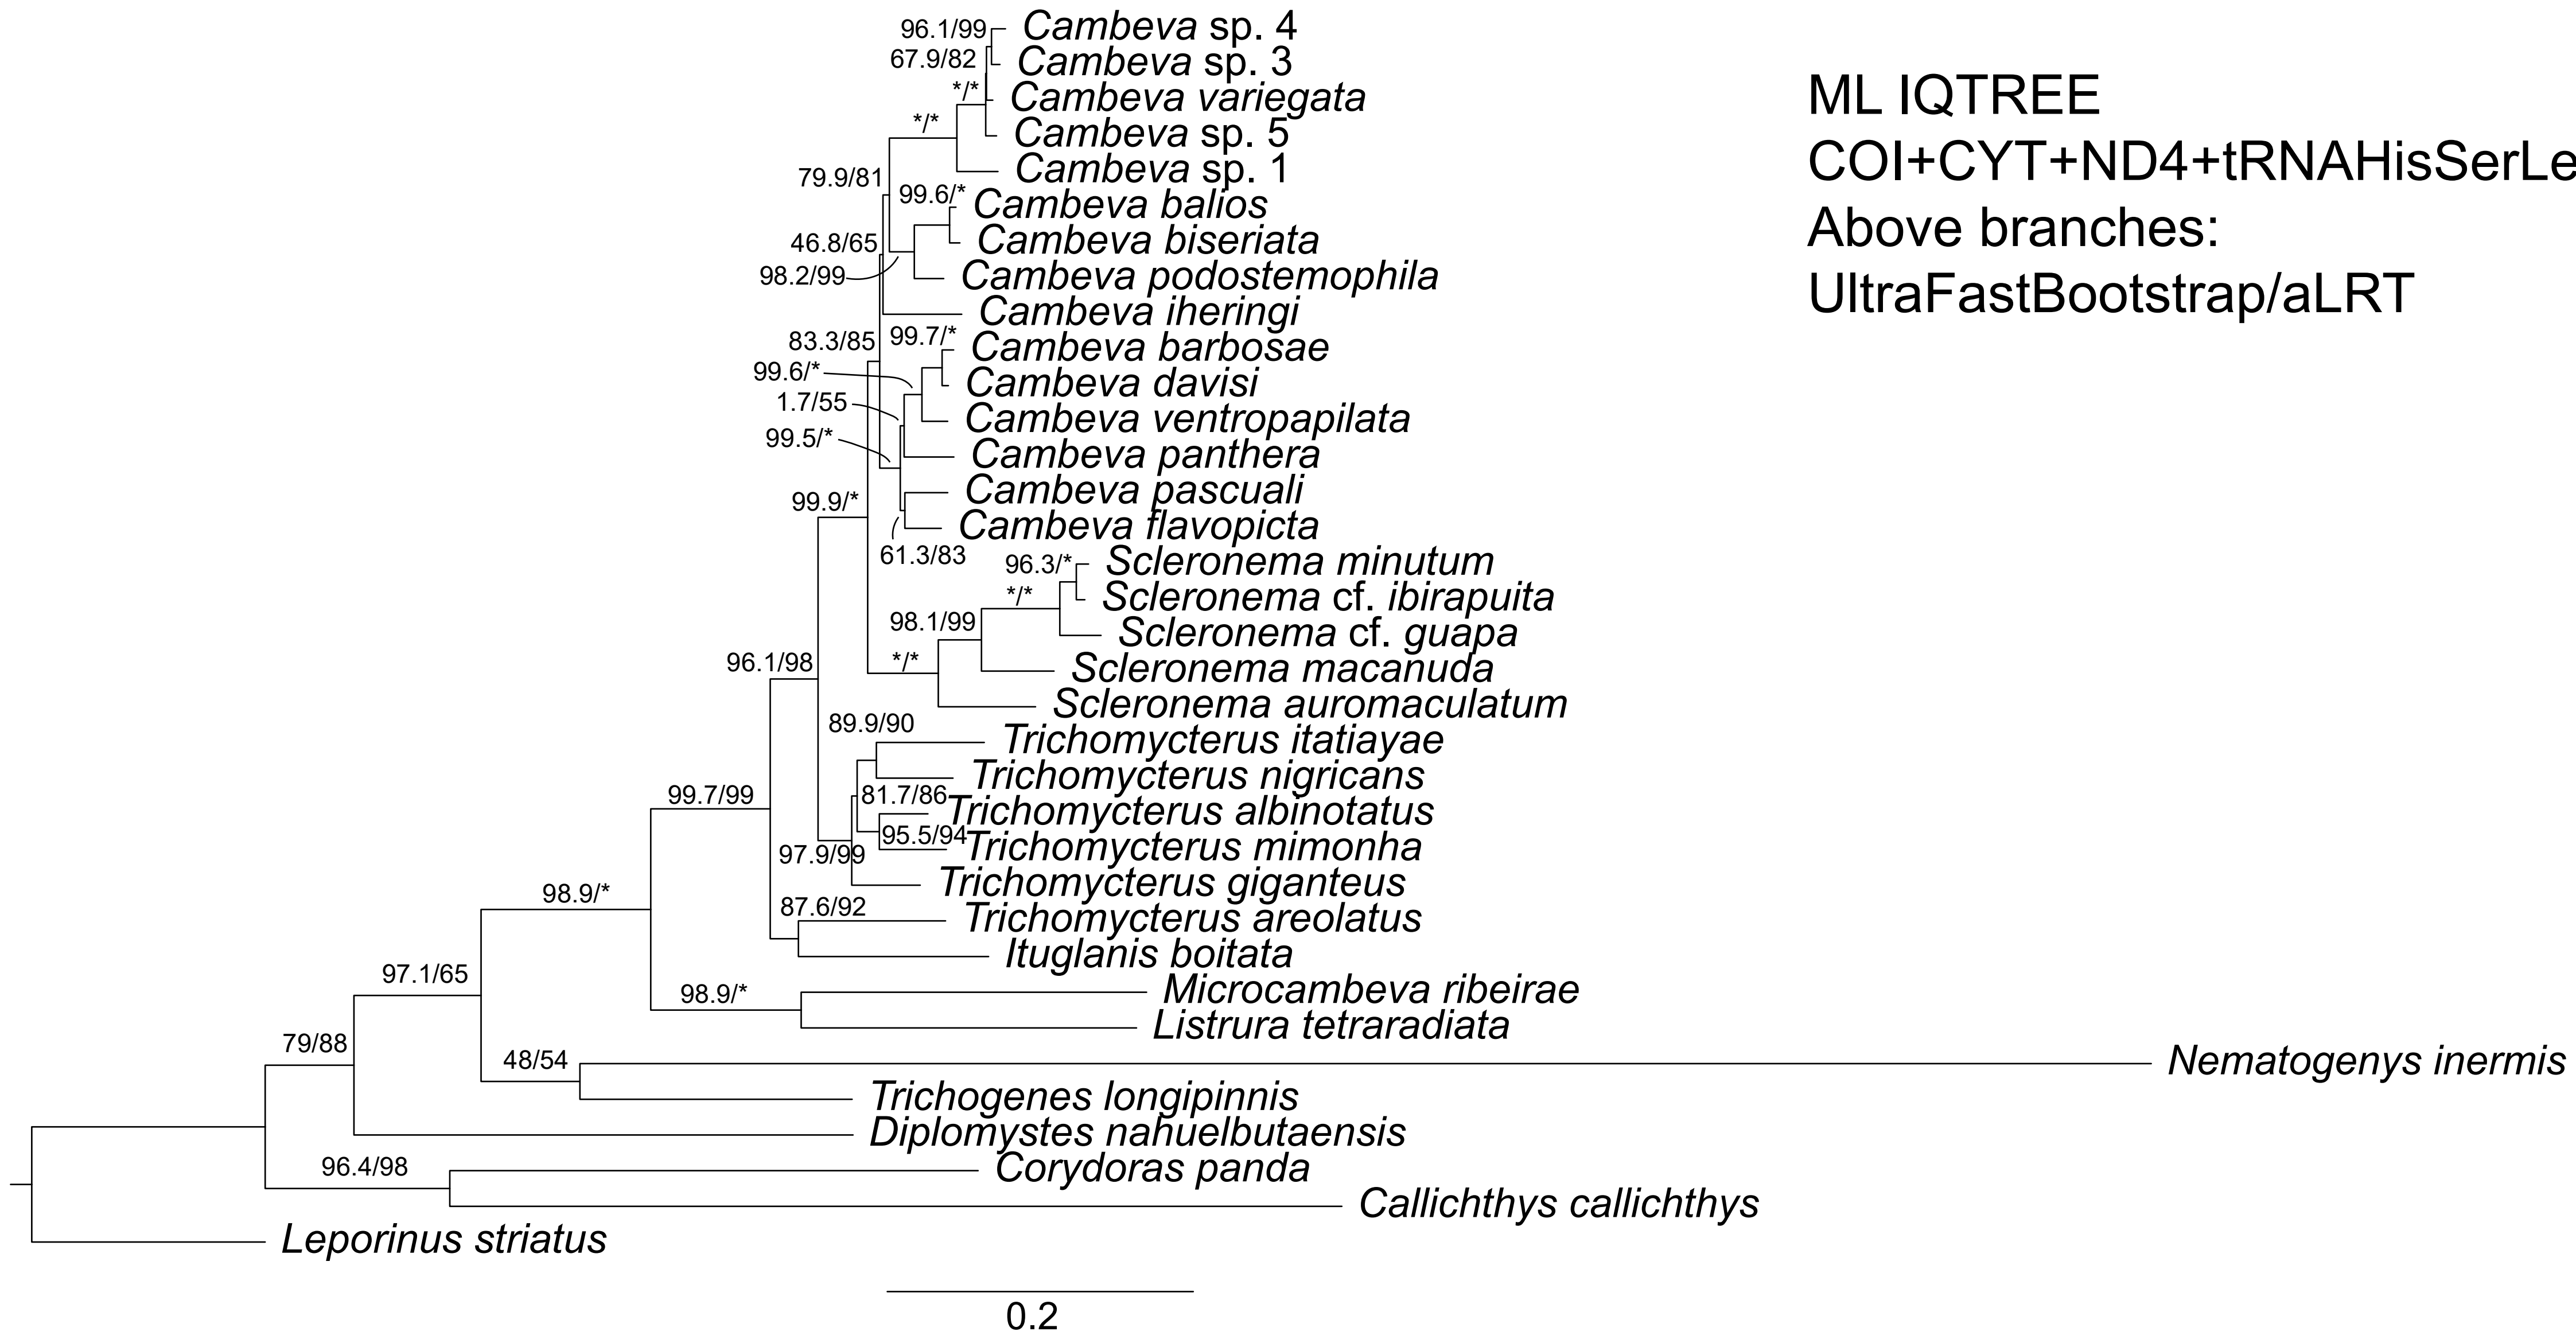

Supplement: s1 [file s1]
